# Supplementary material for: Diverse reactions of N-heterocyclic carbenes with an alkynylborane and isolation of a reactive zwitterionic borataallene
Source: Royal Society of Chemistry journal article supplement (doi:10.1039/c3cc46947f), 2013-10-22
Supplement: c3cc46947f.pdf [file c3cc46947f.pdf]

Supporting Information for:

**Diverse Reactions of N-heterocyclic Carbenes with an Alkynylborane and Isolation of a Reactive  
Zwitterionic Borataallene**

Rüdiger Bertermann, Holger Braunschweig\*, Christopher K. L. Brown, Alexander Damme, Rian D. Dewhurst,  
Christian Hörl, Thomas Kramer, Ivo Krummenacher, Bernd Pfaffinger, Krzysztof Radacki

*Institut für Anorganische Chemie*

*Julius-Maximilians-Universität Würzburg*

*Am Hubland, 97074 Würzburg (Germany)*

*Fax: (+49)931-31-84623*

*E-Mail: h.braunschweig@uni-wuerzburg.de*

**Table of contents**

Experimental Section.....3

Cyclic voltammogram of **4** .....11

Crystal structure determination.....12

References .....14

## Experimental Section

**General considerations:** All manipulations were performed under an inert atmosphere of dry argon using either standard Schlenk-line or glovebox techniques. Deuterated solvents were dried over molecular sieves and degassed by three freeze-pump-thaw cycles prior to use. All other solvent were distilled from appropriate drying agents.<sup>1</sup> Solvents were stored under argon over activated molecular sieves. Ethynylmagnesiumbromide,<sup>2</sup> Mes<sub>2</sub>BF,<sup>3</sup> IMe,<sup>4</sup> IMes<sup>5</sup> and IDip<sup>5</sup> were prepared according to published procedures. NMR spectra were recorded on a Bruker DMX 600 (600.13 MHz for <sup>1</sup>H, 150.93 MHz for <sup>13</sup>C{<sup>1</sup>H}), Bruker Avance 500 NMR spectrometer (500.1 MHz for <sup>1</sup>H, 160.4 MHz for <sup>11</sup>B, 125.76 MHz for <sup>13</sup>C{<sup>1</sup>H}), Bruker Avance 400 NMR spectrometer (128.38 MHz for <sup>11</sup>B) or a Bruker DSX 400 Solid State NMR (128.38 MHz for <sup>11</sup>B, 100.63 MHz for <sup>13</sup>C{<sup>1</sup>H}). Chemical shifts (δ) are given in ppm and are referenced against external Me<sub>4</sub>Si (<sup>1</sup>H, <sup>13</sup>C) and [BF<sub>3</sub>·Et<sub>2</sub>O] (<sup>11</sup>B). Cq refers to quaternary carbon nuclei. Infrared data were acquired on a JASCO FT/IR-6200typeA apparatus. Melting points were measured with a Mettler Toledo DSC 823. Microanalyses were performed on an Elementar vario MICRO cube elemental analyzer. Elemental analyses were acquired on an Elementar Vario MICRO cube instrument or a CHNS-932 (Leco). UV-Vis spectra were measured with a JASCO-V660 UV-Vis spectrometer in a quartz glass cell (10 mm). All cyclic voltammetry experiments were conducted in an argon-filled glovebox, using a Gamry Instruments Reference 600 potentiostat. A standard three-electrode cell configuration was employed using a platinum disk working electrode, a platinum wire counter electrode, and a silver wire, separated by a Vycor tip, serving as the reference electrode. Formal redox potentials are reported versus the ferrocene/ferrocenium (Fc<sup>0/+</sup>) redox couple obtained by using decamethylferrocene (Me<sub>10</sub>Fc) as an internal standard and accounting for the difference in formal redox potentials in the respective solvent media ( $E_{1/2} = E_{1/2}(\text{Fc}^{0/+}) - E_{1/2}(\text{Me}_{10}\text{Fc}^{0/+}) = +455 \text{ mV}$  in THF with 0.1 M nBu<sub>4</sub>NPF<sub>6</sub> as the supporting electrolyte). Compensation for resistive losses (*iR* drop) was employed for all measurements.<sup>6</sup>

## Synthesis of 1:

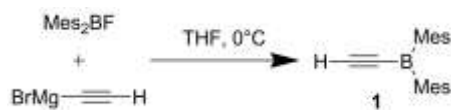

**Figure S1.** Synthesis of *1-dimesitylborylacetylene* (**1**).

Dimesitylfluoroborane (1.00 g, 3.73 mmol) was dissolved in a Schlenk tube in THF (20.0 mL). The reaction mixture was cooled to 0 °C and a solution of ethynylmagnesiumbromide in THF (436 mg, 3.73 mmol, *c* = 25.0 mg/mL) was added over 45 min with a syringe. The reaction mixture was stirred for 1 h at 0 °C. After removing all volatiles under high vacuum the oily residue was extracted with pentanes (3 x 20.0 mL). After removing the solvent under high vacuum, the residue was distilled with a Büchi oven (120 °C,  $1 \cdot 10^{-3}$  bar). Compound **1** was isolated as a colourless solid (399 mg, 1.45 mmol, 39%). Single crystals suitable for X-ray diffraction were obtained by storing a hexane solution for 2 weeks at −30°C.

Melting point: 93.2 °C

Decomposition temperature: ~234 °C

$^1\text{H}$  NMR (500.1 MHz,  $\text{CDCl}_3$ , 296 K):  $\delta$  = 6.81 (s, 4H, *m*- $\text{C}_{\text{Mes}}\text{H}$ ), 4.36 (s, 1H,  $\text{C}\equiv\text{CH}$ ), 2.31 (s, 12H, *o*- $\text{C}_{\text{Mes}}\text{H}_3$ ), 2.28 (s, 6H, *p*- $\text{C}_{\text{Mes}}\text{H}_3$ )

$^{13}\text{C}\{^1\text{H}\}$  NMR (125.7 MHz,  $\text{CDCl}_3$ , 296 K):  $\delta$  = 141.27 (s,  $\text{C}_{\text{Mesq}}$ ), 140.18 (s,  $\text{C}_{\text{Mesq}}$ ), 137.89 (s,  $\text{C}_{\text{Mesq}}$ ), 128.80 (s,  $\text{C}_{\text{MesH}}$ ), 114.6 (s,  $\text{C}\equiv\text{CH}$ ), 23.24 (s, *o*- $\text{C}_{\text{Mes}}\text{H}_3$ ), 21.42 (s, *p*- $\text{C}_{\text{Mes}}\text{H}_3$ )

$^{11}\text{B}\{^1\text{H}\}$  NMR (160.4 MHz,  $\text{CDCl}_3$ , 296 K):  $\delta$  = 64.0 (s)

IR (solid): 3246  $\text{cm}^{-1}$  ( $\equiv\text{C}-\text{H}$  stretch), 2041  $\text{cm}^{-1}$  ( $\text{C}\equiv\text{C}$  stretch)

Elemental analysis for  $\text{C}_{20}\text{H}_{23}\text{B}$  [%]: calculated: C 87.60, H 8.45; found: C 87.67, H 8.55

## Synthesis of 2:

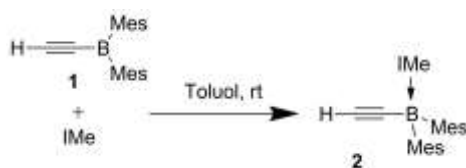

**Figure S2.** Synthesis of 2.

Dimesitylborylacetylene (**1**) (84.7 mg, 0.309 mmol) was dissolved in a Schlenk tube in toluene (5.00 mL). With stirring, a solution of IMe in toluene (2.85 mL, 0.309 mmol,  $c = 10.0 \text{ mg/mL}$ ) was added by syringe. The orange reaction mixture was stirred for 10 min. After removing all volatiles under high vacuum, the residue was taken up with diethyl ether (2.00 mL) and filtered. After removing the solvent under high vacuum, the residue was washed with cold pentane (2 x 5.00 mL). A diethylether / pentane (2:1) solution of the residue was stored for one week at  $-60^\circ\text{C}$ . After removing the supernatant solution by decantation the residue was dried under high vacuum. Compound **1** was isolated as a colourless solid (54.0 mg, 0.201 mmol, 65%). Single crystals suitable for X-ray diffraction were obtained by storing a THF / hexane (2:1) solution at  $-35^\circ\text{C}$  for one week.

Decomposition temperature:  $>197^\circ\text{C}$

$^1\text{H}$  NMR (500.1 MHz,  $\text{CDCl}_3$ , 296 K):  $\delta = 6.89$  (d, 1H,  $^3J_{\text{HH}} = 1.42 \text{ Hz}$ ,  $\text{N}_{\text{NHC}}\text{CH}$ ), 6.74 (obscured, d, 1H,  $^3J_{\text{HH}} = 1.42 \text{ Hz}$ ,  $\text{N}_{\text{NHC}}\text{CH}$ ), 6.74 (bs, 4H,  $\text{C}_{\text{Mes}}\text{H}$ ), 3.80 (s, 3H,  $\text{NCH}_3$ ), 3.12 (s, 3H,  $\text{NCH}_3$ ), 2.25 (s, 6H,  $p\text{-C}_{\text{Mes}}\text{H}_3$ ), 2.17 (s, 1H,  $\text{C}\equiv\text{CH}$ ), 2.06 (sb 12H,  $o\text{-C}_{\text{Mes}}\text{H}_3$ )

$^{13}\text{C}\{^1\text{H}\}$  NMR (125.7 MHz,  $\text{CDCl}_3$ , 296 K):  $\delta = 168.7$  (br m,  $^1J_{\text{BC}} \sim 63 \text{ Hz}$ ,  $\text{B}_{\text{NHC}}\text{Cq}$ ), 146.3 (br m,  $^1J_{\text{BC}} \sim 48 \text{ Hz}$ , Cq), 142.7 (br s, Cq), 133.73 (s, Cq), 127.92 (s,  $\text{C}_{\text{Mes}}\text{H}$ ), 122.38 (s,  $\text{C}_{\text{NHC}}\text{H}$ ), 122.06 (s,  $\text{N}_{\text{NHC}}\text{CH}$ ), 105.3 (br m,  $^1J_{\text{BC}} \sim 73 \text{ Hz}$ ,  $\text{HC}\equiv\text{CB}$ ), 83.8 (s,  $\text{C}\equiv\text{CH}$ ), 38.74 (s,  $\text{C}_{\text{NHC}}\text{H}_3$ ), 37.23 (s,  $\text{C}_{\text{NHC}}\text{H}_3$ ), 24.68 (s,  $p\text{-C}_{\text{Mes}}\text{H}_3$ ), 20.85 (s,  $o\text{-C}_{\text{Mes}}\text{H}_3$ );

$^{11}\text{B}\{^1\text{H}\}$  NMR (160.4 MHz,  $\text{CDCl}_3$ , 296 K):  $\delta = -18.5$  (s)

IR (solid):  $3238 \text{ cm}^{-1}$  ( $\equiv\text{C-H}$  stretch)

Elemental analysis for  $\text{C}_{25}\text{H}_{33}\text{BN}_2$  [%]: calculated: C 81.06, H 8.44, N 7.56; found: C 81.09, H 8.60, N 7.43



128.43 (s, C10H), 127.27 (s, C5H), 127.19 (s, C7H), 124.4 (sb, C15H), 123.53 (s, C12H), 115.41 (s, C17H), 64.97 (s, C1H), 47.07 (s, C3H<sub>2</sub>), 37.41 (s, C2H), 28.65 (s, C14H), 26.3-22.6 (br m, C13H<sub>3</sub>), 22.26 (s, C8H<sub>3</sub>), 22.18 (s, C4H<sub>3</sub>), 21.74 (s, C11H<sub>3</sub>), 21.30 (s, C6H<sub>3</sub>), 20.49 (s, C9H<sub>3</sub>)

<sup>11</sup>B{<sup>1</sup>H} NMR (160.4 MHz, C<sub>6</sub>D<sub>6</sub>, 296 K): δ = 81.4 (s)

<sup>15</sup>N-<sup>1</sup>H HMBC NMR (50.69 MHz, C<sub>6</sub>D<sub>6</sub>, 296 K): δ = -271.6 (s)

IR (hexane): 1639 cm<sup>-1</sup> (C=C stretch), 1604 cm<sup>-1</sup> (C=C stretch)

UV/Vis (hexane): λ<sub>max</sub> = 261.5 nm (ε = 15345 L mol<sup>-1</sup> cm<sup>-1</sup>)

Elemental analysis for C<sub>47</sub>H<sub>59</sub>BN<sub>2</sub> [%]: calculated: C 85.17, H 8.79, N 4.23; found: C 84.70, H 9.04, N 4.13

### Reaction of **1** with IDipp in hexane in order to isolate an intermediate

In a glovebox, **1** (20 mg, 0.073 mmol) and IDip (28.3 mg, 0.073 mmol) were added to a glass vial and hexane (1 mL) was added. The mixture was shaken by hand. After a short time a violet solid precipitated from the red/yellow solution. After filtration, the violet solid was dissolved in C<sub>6</sub>H<sub>5</sub>F, and the <sup>11</sup>B NMR spectrum of this solution showed a mixture of compounds including a major signal for **3** (δ 79.8), a signal presumably corresponding to a borataallene (δ ~27 ppm), and a sharp multiplet at δ 3.0). We were unable to confirm the existence of the presumed borataallene on spectroscopic grounds.

## Synthesis of 4:

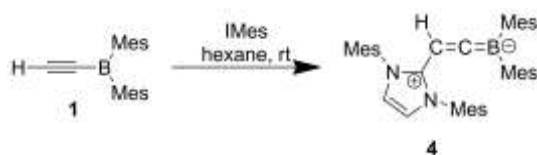

**Figure S5.** Synthesis of **4**.

Dimesitylborylacetylene (**1**) (200 mg, 0.729 mmol) and IMes (222 mg, 0.0729 mmol) were suspended in hexane (2.00 mL) in a vial in a glove box. The solid residue immediately turned red-violet (in one case orange). The solid was isolated by filtration and washed with hexane (5 x 1.00 mL). After removing all volatiles under high vacuum, **4** was isolated as a red violet (or orange) solid (317 mg, 0.548 mmol, 75 %). The red-violet and orange samples were found to be spectroscopically identical. Single crystals suitable for X-ray diffraction were obtained by storing a toluene / pentane solution at  $-35^{\circ}\text{C}$  for two days.

Melting point:  $130^{\circ}\text{C}$

$^1\text{H}$  NMR (600.13 MHz, Tol- $d_8$ , 281 K):  $\delta$  = 6.83 (s, 4H,  $\text{C}_{\text{Mes}}\text{H}$ ), 6.77 (s, 1H,  $\text{C}_{\text{vinyl}}\text{H}$ ), 6.53 (s, 4H,  $\text{C}_{\text{Mes}}\text{H}$ ), 5.54 (s, 2H,  $\text{N}_{\text{NHC}}\text{CH}$ ), 2.30 (s, 6H,  $p\text{-C}_{\text{Mes}}\text{H}_3$ ), 2.26 (s, 12H,  $o\text{-C}_{\text{Mes}}\text{H}_3$ ), 2.11 (sb, 12H,  $o\text{-C}_{\text{Mes}}\text{H}_3$ ), 1.75 (s, 6H,  $p\text{-C}_{\text{Mes}}\text{H}_3$ )

$^{13}\text{C}\{^1\text{H}\}$  NMR (150.9 MHz, Tol- $d_8$ , 281 K):  $\delta$  = 286.8 (bs,  $\text{C}_{\text{NHCq}}$ ), 144.2 (bs, Cq), 142.90 (s, Cq), 140.88 (s, Cq), 139.44 (s, Cq), 137 (bs,  $\text{B}=\text{C}=\text{C}$ ), 135.29 (s, Cq), 132.57 (s, Cq), 132.15 (s, Cq), 129.86 (s,  $\text{C}_{\text{Mes}}\text{H}$ ), 127.54 (s,  $\text{C}_{\text{Mes}}\text{H}$ ), 119.5 (s,  $\text{N}_{\text{NHC}}\text{CH}$ ), 87.20 (s,  $\text{B}=\text{C}=\text{CH}$ ), 24.93 (s,  $p\text{-C}_{\text{Mes}}\text{H}_3$ ), 21.45 (s,  $o\text{-C}_{\text{Mes}}\text{H}_3$ ), 21.12 (s,  $o\text{-C}_{\text{Mes}}\text{H}_3$ ), 17.57 (s,  $p\text{-C}_{\text{Mes}}\text{H}_3$ )

$^{11}\text{B}\{^1\text{H}\}$  NMR (128.38 MHz,  $\text{C}_6\text{D}_6$ , 296 K):  $\delta$  = 22.3 (s)

$^{13}\text{C}$ (VACP/MAS) NMR (150.63 MHz):  $\delta$  = 276.1 (s,  $\text{C}_{\text{NHCq}}$ ), 145.1 (s), 142.1 (s), 139.9 (s), 137.6 (s), 136.1 (s), 133.0 (s), 130.6 (s), 129.4 (s), 127.3 (s), 121.9 (s,  $\text{N}_{\text{NHC}}\text{CH}$ ), 119.9 (s,  $\text{N}_{\text{NHC}}\text{CH}$ ), 88.0 (s,  $\text{C}=\text{CH}$ ), 25.7 (s,  $\text{C}_{\text{Mes}}\text{H}_3$ ), 24.6 (s,  $\text{C}_{\text{Mes}}\text{H}_3$ ), 22.7 (s,  $\text{C}_{\text{Mes}}\text{H}_3$ ), 20.7 (s,  $\text{C}_{\text{Mes}}\text{H}_3$ ), 19.4 (s,  $\text{C}_{\text{Mes}}\text{H}_3$ ), 18.5 (s,  $\text{C}_{\text{Mes}}\text{H}_3$ ), 17.2 (s,  $\text{C}_{\text{Mes}}\text{H}_3$ ), 15.5 (s,  $\text{C}_{\text{Mes}}\text{H}_3$ )

$^{11}\text{B}$ (VACP/MAS) NMR (128.38 MHz):  $\delta$  = 20.5 (s)

IR (solid):  $2919\text{ cm}^{-1}$  (C–H stretch),  $2846\text{ cm}^{-1}$  (C–H stretch),  $1606\text{ cm}^{-1}$  (C=C stretch),  $1444\text{ cm}^{-1}$  (C=C stretch)

Elemental analysis for  $\text{C}_{25}\text{H}_{33}\text{BN}_2$  [%]: calculated: C 85.10, H 8.19, N 4.84; found: C 84.80, H 8.24, N 4.70



### Initial reaction of **1** with IMes in C<sub>6</sub>D<sub>6</sub>

Solid **1** (27 mg, 0.098 mmol) and IMes (30 mg, 0.099 mmol) were added to a sealable NMR tube in a glovebox, and were dissolved in C<sub>6</sub>D<sub>6</sub>. Directly after mixing the reagents the <sup>11</sup>B NMR spectrum of the mixture showed a major signal at δ 22.6 (**4**) along with a minor signal at ca. δ 73.5 which we assumed to be the boraindane compound analogous to **3**. After 3 d the <sup>11</sup>B NMR spectrum of the mixture showed that the signal for **4** had diminished while the signal at ca. δ 74 had grown. Nevertheless we were unable to isolate this compound.

## UV/Vis Spectrum of 4

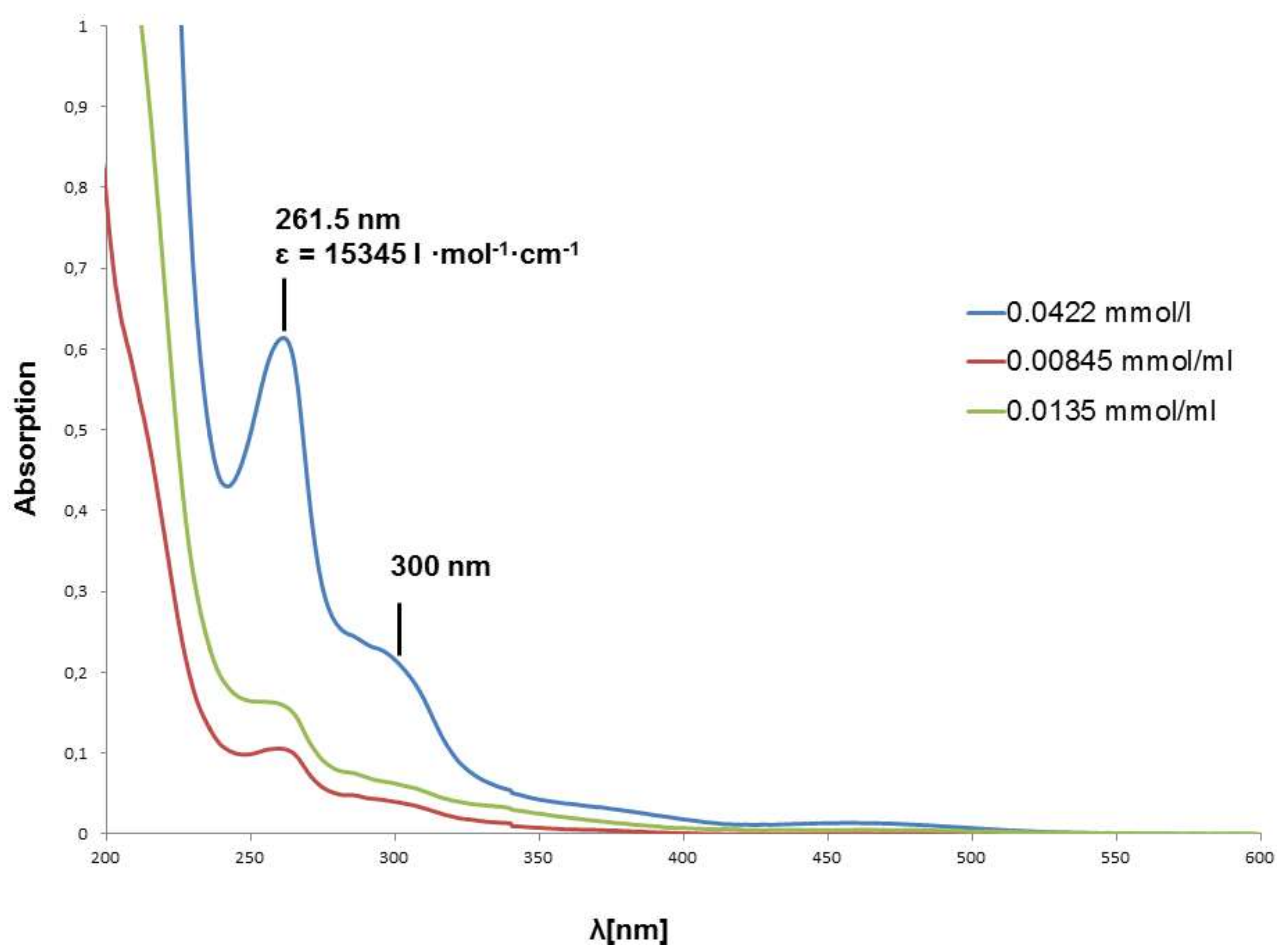

**Figure S6.** UV/Vis spectrum of **4**.

Cyclic voltammogram of **4**

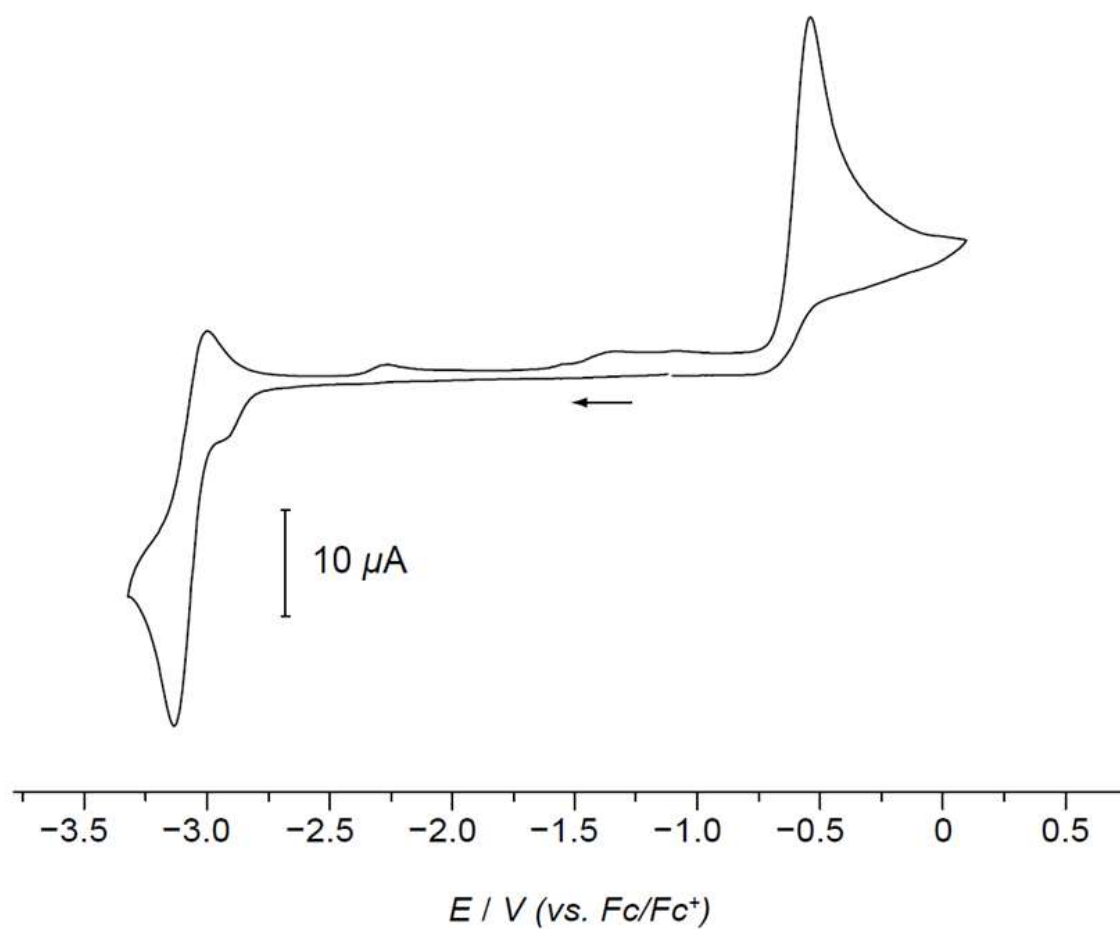

**Figure S7.** Cyclic voltammogram of **4**.

## Crystal structure determination

The crystal data of **1-4** were collected on a Bruker SMART-APEX II diffractometer with a CCD area detector and multi-layer mirror monochromated Mo<sub>K</sub>α radiation. The structure was solved using direct methods, refined with the Shelx software package and expanded using Fourier techniques. All non-hydrogen atoms were refined anisotropically. Hydrogen atoms were included in structure factor calculations. All hydrogen atoms were assigned to idealized geometric positions.

Crystal data for **1**: C<sub>20</sub>H<sub>23</sub>B,  $M_r = 274.19$ , colourless block, 0.41×0.162×0.104 mm<sup>3</sup>, triclinic space group *P*-1,  $a = 8.50(2)$  Å,  $b = 12.77(5)$  Å,  $c = 15.65(6)$  Å,  $\alpha = 79.57(16)^\circ$ ,  $\beta = 89.07(13)^\circ$ ,  $\gamma = 88.20(12)^\circ$ ,  $V = 1670(10)$  Å<sup>3</sup>,  $Z = 4$ ,  $\rho_{\text{calcd}} = 1.091$  g·cm<sup>-3</sup>,  $\mu = 0.060$  mm<sup>-1</sup>,  $F(000) = 592$ ,  $T = 100(2)$  K,  $R_I = 0.0415$ ,  $wR^2 = 0.0929$ , 4890 independent reflections [ $2\theta \leq 46.78^\circ$ ] and 399 parameters.

Crystal data for **2**: C<sub>57</sub>H<sub>70</sub>B<sub>2</sub>N<sub>4</sub>,  $M_r = 832.79$ , colourless block, 0.35×0.183×0.126 mm<sup>3</sup>, triclinic space group *P*-1,  $a = 11.5165(8)$  Å,  $b = 14.9171(12)$  Å,  $c = 15.0308(11)$  Å,  $\alpha = 93.716(4)^\circ$ ,  $\beta = 107.248(3)^\circ$ ,  $\gamma = 99.859(3)^\circ$ ,  $V = 2411.2(3)$  Å<sup>3</sup>,  $Z = 2$ ,  $\rho_{\text{calcd}} = 1.147$  g·cm<sup>-3</sup>,  $\mu = 0.066$  mm<sup>-1</sup>,  $F(000) = 900$ ,  $T = 100(2)$  K,  $R_I = 0.0575$ ,  $wR^2 = 0.1111$ , 10290 independent reflections [ $2\theta \leq 53.72^\circ$ ] and 585 parameters.

Crystal data for **3**: C<sub>47</sub>H<sub>59</sub>BN<sub>2</sub>,  $M_r = 662.77$ , red block, 0.489×0.344×0.156 mm<sup>3</sup>, monoclinic space group *P*2<sub>1</sub>/*c*,  $a = 19.927(9)$  Å,  $b = 18.683(10)$  Å,  $c = 11.255(6)$  Å,  $\beta = 100.333(11)^\circ$ ,  $V = 4122(4)$  Å<sup>3</sup>,  $Z = 4$ ,  $\rho_{\text{calcd}} = 1.068$  g·cm<sup>-3</sup>,  $\mu = 0.060$  mm<sup>-1</sup>,  $F(000) = 1440$ ,  $T = 100(2)$  K,  $R_I = 0.1063$ ,  $wR^2 = 0.1816$ , 8769 independent reflections [ $2\theta \leq 53.56^\circ$ ] and 487 parameters.

Crystal data for **4**: C<sub>96</sub>H<sub>108</sub>B<sub>2</sub>N<sub>4</sub>,  $M_r = 1339.48$ , yellow needle, 47.00×0.09×0.08 mm<sup>3</sup>, monoclinic space group *P*2<sub>1</sub>/*c*,  $a = 22.913(13)$  Å,  $b = 14.472(9)$  Å,  $c = 24.947(14)$  Å,  $\beta = 104.380(12)^\circ$ ,  $V = 8013(8)$  Å<sup>3</sup>,  $Z = 4$ ,  $\rho_{\text{calcd}} = 1.110$  g·cm<sup>-3</sup>,  $\mu = 0.063$  mm<sup>-1</sup>,  $F(000) = 2888$ ,  $T = 100(2)$  K,  $R_I = 0.2090$ ,  $wR^2 = 0.3028$ , 17115 independent reflections [ $2\theta \leq 53.66^\circ$ ] and 1042 parameters.

Crystallographic data have been deposited with the Cambridge Crystallographic Data Center as supplementary publication no. CCDC-948685 (**1**), CCDC-948686 (**2**), CCDC-948687 (**3**) and CCDC-948688 (**4**). These data can be obtained free of charge from The Cambridge Crystallographic Data Centre via [www.ccdc.cam.ac.uk/data\\_request/cif](http://www.ccdc.cam.ac.uk/data_request/cif)

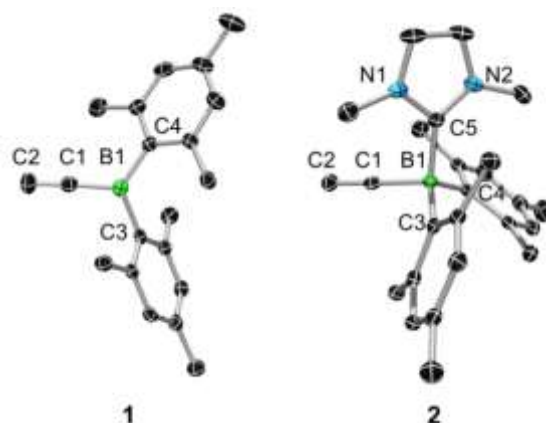

**Figure S8.** Molecular structure of **1** and **2** in the solid state. Thermal ellipsoids displayed at the 50% probability level. For clarity, only one of two molecules in the asymmetric units is displayed. Hydrogen atoms have been omitted. Relevant bond lengths [Å]: **1**: C1–C2: 1.194(5), B1–C1: 1.527(6), B1–C3: 1.565(5), B1–C4: 1.575(5); **2**: C1–C2: 1.197(2), B1–C1: 1.616(2), B1–C3: 1.660(2), B1–C4: 1.669(2), B1–C5: 1.641(5).

## References

1. Perrin, D. D.; Armarego, W. L. F., *Purification of Laboratory Chemicals*. 3 ed.; Pergamon Press: Oxford, 1988.
2. Bates, R., *Org. Proc. Res. & Dev.* **2007**, *11*, 295.
3. Eisch, J. J.; Shafii, B.; Odom, J. D.; Rheingold, A. L., *J. Am. Chem. Soc.* **1990**, *112*, 1847.
4. T. Schaub, M. Backes, U. Radius, *Organometallics* **2006**, *25*, 4196.
5. Hintermann, L., *Beilstein J. Org. Chem.* **2007**, *3*.
6. Noviandri, I.; Brown, K. N.; Fleming, D. S.; Gulyas, P. T.; Lay, P. A.; Masters, A. F.; Phillips, L., *J. Phys. Chem. B* **1999**, *103*, 6713.
